# Supplementary material for: Mechanism of protonation induced changes in Raman spectra of a trisheteroleptic ruthenium complex revealed by DFT calculations
Source: Royal Society of Chemistry journal article supplement (doi:10.1039/c3ra00157a), 2013-01-01
Supplement: c3ra00157a.pdf [file c3ra00157a.pdf]

## Supporting Information

### Mechanism of protonation induced changes in Raman spectra of a trisheteroleptic ruthenium complex revealed by DFT calculations

*Maria Wächtler<sup>a,b</sup>, Maximilian Bräutigam<sup>a,b</sup>, Jürgen Popp<sup>a,b</sup>, Benjamin Dietzek<sup>a,b,c,\*</sup>*

a Institute of Physical Chemistry and Abbe Center of Photonics, Friedrich-Schiller University Jena, Helmholtzweg 4, 07743, Jena, Germany

b Institute of Photonic Technology Jena (IPHT) e.V., Albert-Einstein-Str. 9, 07745, Jena, Germany

c Jena Center for Soft Matter (JCSM), Humboldtstr. 10, 07743, Jena, Germany

**\*Corresponding Author:**

[Benjamin.dietzek@ipht-jena.de](mailto:Benjamin.dietzek@ipht-jena.de)

Telefon +49 (0)3641 206-332

Telefax +49 (0)3641 206-399

**Tabelle S1: calculated RuN bond lengths in pm**

|                                  | <b>Ru</b> | <b>RuH<sub>2</sub></b> |
|----------------------------------|-----------|------------------------|
| RuN1 (tmbibzim, opposite dppz)   | 211.5     | 213.8                  |
| RuN1' (tmbibzim, opposite tbbpy) | 211.7     | 214.2                  |
| RuN2 (tbbpy, opposite dppz)      | 208.1     | 209.1                  |
| RuN2' (tbbpy, opposite tmbibzim) | 209.5     | 208.6                  |
| RuN3 (dppz, opposite tbbpy)      | 208.7     | 210.2                  |
| RuN3' (dppz, opposite tmbibzim)  | 209.9     | 209.2                  |

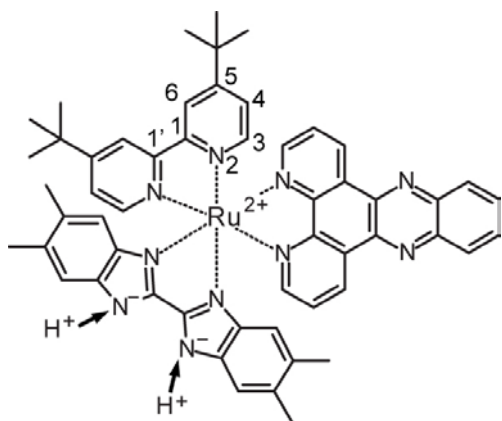

Figure S1: Numbering of the atoms used in table S2.

Tabelle S2: calculated bond lengths in pm and bond angles in degree of tbbpy

|         | Ru     | RuH <sub>2</sub> |
|---------|--------|------------------|
| C1N2    | 136.5  | 136.5            |
| C1C1'   | 147.6  | 147.7            |
| N2C3    | 134.5  | 134.4            |
| C3C4    | 139.0  | 139.0            |
| C4C5    | 140.1  | 140.0            |
| C5C6    | 140.2  | 140.3            |
| C6C1    | 139.5  | 139.4            |
| C6C1N2  | 121.2° | 121.1°           |
| C1N2C3  | 118.0° | 118.1°           |
| N2C3C4  | 123.0° | 123.0°           |
| C3C4C5  | 120.3° | 120.3°           |
| C4C5C6  | 116.0° | 116.1°           |
| C5C6C1  | 121.4° | 121.4°           |
| C1'C1N2 | 114.8° | 114.9°           |

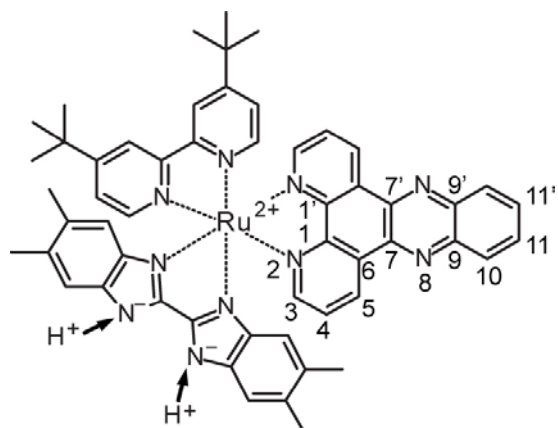

Figure S2: Numbering of the atoms used in table S3.

Tabelle S3: selected bond lengths in pm and bond angles in degree of dppz

|         | Ru    | RuH <sub>2</sub> |
|---------|-------|------------------|
| C1N2    | 136.5 | 136.5            |
| C1C1'   | 144.6 | 144.7            |
| N2C3    | 134.3 | 134.1            |
| C3C4    | 139.8 | 139.9            |
| C4C5    | 138.8 | 138.7            |
| C5C6    | 140.4 | 140.4            |
| C6C1    | 140.6 | 140.6            |
| C6C7    | 146.5 | 146.4            |
| C7C7'   | 143.9 | 143.7            |
| C7N8    | 132.7 | 132.7            |
| N8C9    | 135.2 | 135.2            |
| C9C10   | 142.2 | 142.2            |
| C9C9'   | 143.8 | 143.9            |
| C10C11  | 137.5 | 137.5            |
| C11C11' | 142.4 | 142.4            |

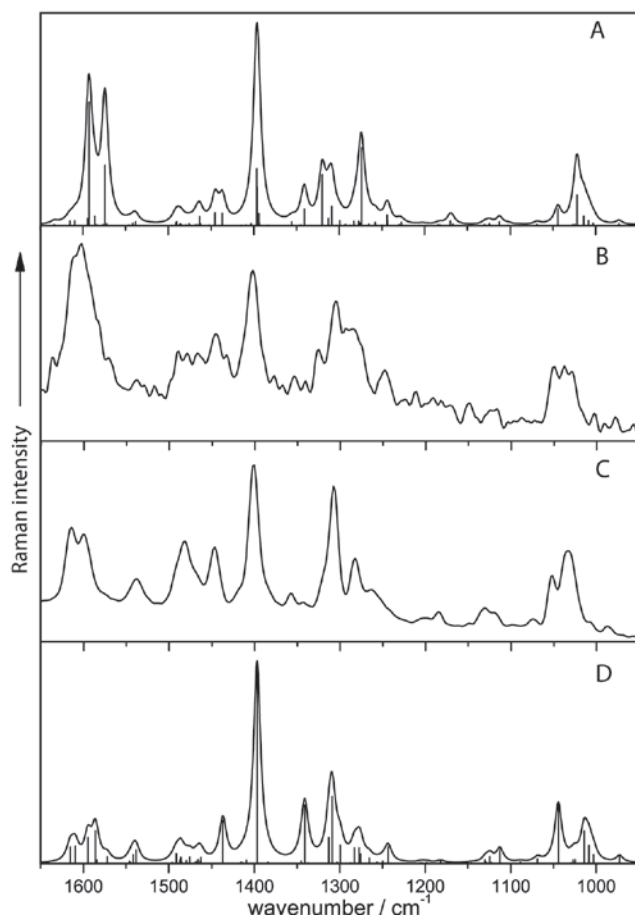

**Figure S3:** Comparison of experimental Raman spectra of **RuH<sub>2</sub>** (B) and **[(tbbpy)<sub>2</sub>Ru(dppz)](PF<sub>6</sub>)<sub>2</sub>** (C) in the solid state at 1064 nm excitation with the calculated Raman spectrum of **RuH<sub>2</sub>** (A) and the spectrum of **RuH<sub>2</sub>** without tmbibzim modes (D), which is very similar to the Raman spectrum of and **[(tbbpy)<sub>2</sub>Ru(dppz)](PF<sub>6</sub>)<sub>2</sub>**. The poor quality of the spectrum of **RuH<sub>2</sub>** is due to the strong background.

**Table S4:** Signal positions of the experimental and calculated Raman bands and their respective Raman activity for **Ru** and **RuH<sub>2</sub>**. tmbibzim modes are marked red and phz centered dppz modes are marked in green corresponding to Figure 2 in the main text. Mixed modes involving more than one ligand are marked yellow.

| <b>Ru</b><br>Freq.<br>(Calc.)<br>/ cm <sup>-1</sup> | Raman<br>activity | <b>RuH<sub>2</sub></b><br>Freq.<br>(Calc.)<br>/ cm <sup>-1</sup> | Raman<br>activity | Assignment <sup>a</sup>                                                |
|-----------------------------------------------------|-------------------|------------------------------------------------------------------|-------------------|------------------------------------------------------------------------|
|                                                     |                   | 1633                                                             | 197.7             | v <sub>sym</sub> -ring, tmbibzim                                       |
|                                                     |                   | 1632                                                             | 34.8              | v <sub>asym</sub> -ring, tmbibzim                                      |
| 1622                                                | 20.5              | 1622                                                             | 17.1              | v <sub>asym</sub> -ring, dppz phenaz                                   |
| 1618                                                | 635.23            |                                                                  |                   | v <sub>sym</sub> -ring, tmbibzim                                       |
| 1617                                                | 148.6             |                                                                  |                   | v <sub>asym</sub> -ring, tmbibzim                                      |
| 1613                                                | 1515.5            | 1615                                                             | 824.3             | v <sub>asym</sub> -ring, tbbpy                                         |
| 1609                                                | 861.0             | 1610                                                             | 852.1             | v <sub>sym</sub> -ring, tbbpy                                          |
| 1591                                                | 2086.0            | 1595                                                             | 1239.0            | v <sub>asym</sub> -ring, dppz phen                                     |
|                                                     |                   | 1593                                                             | 20710.0           | v <sub>sym</sub> -ring, tmbibzim                                       |
| 1584                                                | 1123.9            | 1586                                                             | 1546.2            | v <sub>sym</sub> -ring, dppz phen                                      |
| 1580                                                | 416.2             | 1584                                                             | 166.3             | v <sub>asym</sub> -ring, dppz phen                                     |
|                                                     |                   | 1576                                                             | 161.2             | v <sub>asym</sub> -ring, tmbibzim                                      |
|                                                     |                   | 1574                                                             | 9867.4            | v <sub>sym</sub> -ring, tmbibzim                                       |
|                                                     |                   | 1572                                                             | 321.5             | v <sub>sym</sub> -ring, dppz phen                                      |
| 1569                                                | 11377.0           |                                                                  |                   | v <sub>sym</sub> -ring, tmbibzim, v <sub>sym</sub> -ring,<br>dppz phen |
| 1567                                                | 363.2             |                                                                  |                   | v <sub>sym</sub> -ring, dppz phen, v <sub>sym</sub> -ring,<br>tmbibzim |
|                                                     |                   | 1546                                                             | 107.1             | v <sub>sym</sub> -ring, dppz phz; v <sub>asym</sub> -ring,<br>tbbpy    |
| 1546                                                | 73.9              |                                                                  |                   | v <sub>sym</sub> -ring, dppz phz                                       |
|                                                     |                   | 1545                                                             | 46.9              | v <sub>asym</sub> -ring, tbbpy; v <sub>sym</sub> -ring, dppz<br>phz    |
| 1543                                                | 7.2               |                                                                  |                   | v <sub>asym</sub> -ring, tmbibzim                                      |
| 1542                                                | 55.8              |                                                                  |                   | v <sub>asym</sub> -ring, tbbpy; v <sub>asym</sub> -ring,<br>dppz phz   |
| 1542                                                | 190.6             |                                                                  |                   | v <sub>asym</sub> -ring, dppz phz; v <sub>asym</sub> -ring,<br>tbbpy   |
|                                                     |                   | 1542                                                             | 385.2             | v <sub>asym</sub> -ring, dppz phz                                      |
| 1534                                                | 593.4             | 1538                                                             | 589.5             | v <sub>sym</sub> -ring, tbbpy                                          |
| 1519                                                | 4616.3            |                                                                  |                   | v <sub>sym</sub> -ring, tmbibzim                                       |
|                                                     |                   | 1496                                                             | 52.5              | v <sub>asym</sub> -ring, tmbibzim; v-tb,<br>tbbpy                      |
|                                                     |                   | 1496                                                             | 35.7              | v-tb, tbbpy; v <sub>asym</sub> -ring,<br>tmbibzim                      |
| 1496                                                | 6.9               |                                                                  |                   | v-tb, tbbpy                                                            |

|      |        |      |        |                                                                                                  |
|------|--------|------|--------|--------------------------------------------------------------------------------------------------|
| 1495 | 48.3   | 1496 | 38.2   | v-tb, tbbpy                                                                                      |
|      |        | 1491 | 405.5  | v <sub>sym</sub> -ring, dppz; v <sub>sym</sub> -ring, tmbibzim                                   |
|      |        | 1490 | 546.4  | v <sub>sym</sub> -ring, tmbibzim; v <sub>sym</sub> -ring, dppz                                   |
| 1489 | 433.6  |      |        | v <sub>sym</sub> -ring, dppz                                                                     |
| 1485 | 45.9   | 1487 | 134.1  | v <sub>asym</sub> -ring, tbbpy                                                                   |
|      |        | 1486 | 256.6  | v <sub>asym</sub> -ring, dppz; v <sub>sym</sub> -ring, tbbpy; v <sub>asym</sub> -ring, tmbibzim  |
|      |        | 1486 | 132.5  | v <sub>sym</sub> -ring, tbbpy; v <sub>asym</sub> -ring, tmbibzim; v <sub>asym</sub> -ring, dppz; |
| 1485 | 22.8   |      |        | v <sub>asym</sub> -ring, tbbpy; v-tb, tbbpy; v <sub>asym</sub> -ring, dppz                       |
| 1485 | 57.9   |      |        | v <sub>asym</sub> -ring, dppz; v <sub>asym</sub> -ring, tbbpy; v-tb, tbbpy                       |
|      |        | 1485 | 63.0   | v-tb, tbbpy                                                                                      |
|      |        | 1485 | 50.8   | v-tb, tbbpy                                                                                      |
| 1484 | 92.4   |      |        | v <sub>asym</sub> -ring, dppz; v <sub>asym</sub> -ring, tbbpy; v-tb, tbbpy                       |
|      |        | 1484 | 126.6  | v <sub>asym</sub> -ring, tmbibzim; v <sub>sym</sub> -ring, tbbpy; v <sub>asym</sub> -ring, dppz  |
| 1482 | 340.1  |      |        | v <sub>sym</sub> -ring, tbbpy                                                                    |
| 1481 | 23.2   |      |        | v <sub>asym</sub> -ring, tmbibzim                                                                |
| 1480 | 43.6   |      |        | v <sub>sym</sub> -ring, tmbibzim                                                                 |
| 1478 | 273.0  | 1480 | 112.6  | v <sub>sym</sub> -ring, tbbpy                                                                    |
|      |        | 1476 | 275.0  | v <sub>asym</sub> -ring, tbbpy; v <sub>asym</sub> -ring, tmbibzim                                |
|      |        | 1475 | 73.9   | v <sub>asym</sub> -ring, tmbibzim; v <sub>asym</sub> -ring, tbbpy                                |
|      |        | 1474 | 37.4   | v <sub>sym</sub> -ring, tmbibzim                                                                 |
| 1474 | 12.6   |      |        | v <sub>asym</sub> -ring, tmbibzim                                                                |
| 1472 | 760.5  |      |        | v <sub>asym</sub> -ring, tbbpy, v <sub>sym</sub> -ring, tmbibzim                                 |
| 1472 | 1009.2 |      |        | v <sub>sym</sub> -ring, tmbibzim, v <sub>asym</sub> -ring, tbbpy                                 |
| 1468 | 148.3  | 1469 | 65.9   | v <sub>asym</sub> -ring, tbbpy                                                                   |
|      |        | 1468 | 123.9  | v <sub>asym</sub> -ring, tmbibzim, v <sub>sym</sub> -ring, dppz                                  |
| 1467 | 43.5   | 1467 | 41.3   | v-ch3, tmbibzim                                                                                  |
| 1467 | 46.4   | 1467 | 56.2   | v-ch3, tmbibzim                                                                                  |
| 1466 | 92.8   | 1466 | 68.8   | v <sub>sym</sub> -ring, tbbpy                                                                    |
|      |        | 1466 | 153.6  | v <sub>sym</sub> -ring, dppz; v <sub>asym</sub> -ring, tmbibzim                                  |
| 1465 | 4.5    | 1465 | 4.8    | v-tb, tbbpy                                                                                      |
| 1465 | 11.1   | 1465 | 3.5    | v-tb, tbbpy                                                                                      |
|      |        | 1464 | 1252.0 | v <sub>sym</sub> -ring, tmbibzim; v <sub>asym</sub> -ring, dppz;                                 |
| 1463 | 54.5   | 1463 | 87.3   | v-tb, tbbpy                                                                                      |
| 1463 | 49.6   | 1463 | 48.6   | v-tb, tbbpy                                                                                      |
|      |        | 1462 | 245.7  | v <sub>asym</sub> -ring, dppz; v <sub>sym</sub> -ring,                                           |

|      |        |      |        |                                                                     |
|------|--------|------|--------|---------------------------------------------------------------------|
|      |        |      |        | tmbibzim                                                            |
| 1462 | 79.5   |      |        | v <sub>sym</sub> -ring, dppz                                        |
| 1459 | 95.1   |      |        | v <sub>asym</sub> -ring, dppz                                       |
| 1458 | 27.4   |      |        | v <sub>asym</sub> -ring, tmbibzim                                   |
| 1455 | 2800.2 |      |        | v <sub>sym</sub> -ring, tmbibzim                                    |
| 1454 | 126.7  | 1453 | 54.0   | v-ch3, tmbibzim                                                     |
| 1454 | 87.6   | 1452 | 55.9   | v-ch3, tmbibzim                                                     |
|      |        | 1448 | 4.1    | v <sub>asym</sub> -ring, tmbibzim                                   |
|      |        | 1445 | 1724.4 | v <sub>sym</sub> -ring, tmbibzim                                    |
| 1442 | 17.1   |      |        | v <sub>asym</sub> -ring, tmbibzim                                   |
| 1434 | 2013.3 | 1436 | 1624.0 | v <sub>sym</sub> -ring, dppz phen                                   |
| 1429 | 310.4  |      |        | v <sub>sym</sub> -ring, tmbibzim                                    |
| 1419 | 12.6   |      |        | v <sub>asym</sub> -ring, tmbibzim                                   |
|      |        | 1415 | 36.0   | v <sub>asym</sub> -ring, dppz phen; v <sub>sym</sub> -ring, tbbpy   |
| 1415 | 47.4   |      |        | v <sub>sym</sub> -ring, tbbpy;                                      |
|      |        | 1415 | 42.1   | v <sub>sym</sub> -ring, tbbpy; v <sub>asym</sub> -ring, dppz phen   |
| 1414 | 12.4   |      |        | v <sub>asym</sub> -ring, dppz phen                                  |
| 1413 | 45.1   | 1414 | 25.0   | v <sub>asym</sub> -ring, tbbpy                                      |
| 1412 | 6.9    | 1413 | 3.6    | v <sub>asym</sub> -ring, tbbpy                                      |
| 1408 | 84.9   | 1409 | 110.4  | v <sub>sym</sub> -ring, tbbpy                                       |
| 1401 | 566.6  | 1404 | 26.5   | v-ch3, tmbibzim                                                     |
| 1401 | 17.9   | 1403 | 257.9  | v-ch3, tmbibzim                                                     |
|      |        | 1401 | 7.7    | v <sub>asym</sub> -ring, tmbibzim                                   |
|      |        | 1397 | 7086.7 | v <sub>sym</sub> -ring, dppz phz; v <sub>sym</sub> -ring, tmbibzim  |
|      |        | 1396 | 4752.1 | v <sub>sym</sub> -ring, tmbibzim; v <sub>sym</sub> -ring, dppz phz  |
| 1395 | 8354.6 |      |        | v <sub>sym</sub> -ring, dppz phz                                    |
|      |        | 1394 | 1486.3 | v-ch3, tmbibzim; v <sub>sym</sub> -ring, tmbibzim                   |
|      |        | 1393 | 321.8  | v-ch3, tmbibzim; v <sub>asym</sub> -ring, tmbibzim                  |
| 1391 | 29.2   |      |        | v-ch3, tmbibzim                                                     |
| 1390 | 173.2  |      |        | v-ch3, tmbibzim                                                     |
| 1384 | 43.9   | 1384 | 37.1   | v-tb, tbbpy                                                         |
| 1383 | 9.0    | 1384 | 10.7   | v-tb, tbbpy                                                         |
| 1383 | 25.8   | 1383 | 4.6    | v-tb, tbbpy                                                         |
| 1383 | 4.5    | 1383 | 29.1   | v-tb, tbbpy                                                         |
|      |        | 1356 | 462.7  | v <sub>sym</sub> -ring, tmbibzim                                    |
| 1344 | 26.9   | 1345 | 85.8   | v <sub>sym</sub> -ring, dppz phz                                    |
|      |        | 1341 | 1896.3 | v <sub>sym</sub> -ring, dppz phen                                   |
| 1339 | 1929.2 |      |        | v <sub>sym</sub> -ring, dppz phen; v <sub>sym</sub> -ring, tmbibzim |
|      |        | 1338 | 3.1    | v <sub>asym</sub> -ring, tmbibzim                                   |
| 1336 | 49.9   | 1337 | 13.1   | v <sub>asym</sub> -ring, dppz phz                                   |



|      |        |      |        |                                                                                                                     |
|------|--------|------|--------|---------------------------------------------------------------------------------------------------------------------|
| 1335 | 898.3  |      |        | $v_{\text{sym}}\text{-ring, tmbibzim}; v_{\text{sym}}\text{-ring, dppz phen}$                                       |
| 1332 | 142.5  |      |        | $v_{\text{asym}}\text{-ring, tmbibzim}$                                                                             |
|      |        | 1319 | 5573.5 | $v_{\text{sym}}\text{-ring, tmbibzim}$                                                                              |
| 1318 | 1338.6 |      |        | $v_{\text{sym}}\text{-ring, tmbibzim}$                                                                              |
| 1311 | 1100.1 | 1313 | 796.1  | $v_{\text{sym}}\text{-ring, tbbpy}$                                                                                 |
|      |        | 1308 | 2050.5 | $v_{\text{sym}}\text{-ring, dppz phen}$                                                                             |
| 1304 | 1878.9 |      |        | $v_{\text{sym}}\text{-ring, dppz phen}; v_{\text{asym}}\text{-ring, tmbibzim}$                                      |
|      |        | 1303 | 38.2   | $v_{\text{asym}}\text{-ring, tbbpy}$                                                                                |
| 1301 | 872.1  |      |        | $v_{\text{asym}}\text{-ring, tmbibzim}; v_{\text{sym}}\text{-ring, dppz phen}; v_{\text{asym}}\text{-ring, tbbpy};$ |
| 1300 | 1418.7 |      |        | $v_{\text{asym}}\text{-ring, tbbpy}; v_{\text{asym}}\text{-ring, tmbibzim}$                                         |
| 1298 | 9076.0 |      |        | $v_{\text{sym}}\text{-ring, tmbibzim}; v_{\text{asym}}\text{-ring, tbbpy};$                                         |
| 1298 | 477.9  | 1300 | 556.2  | $v_{\text{asym}}\text{-ring, dppz phen}$                                                                            |
|      |        | 1293 | 123.8  | $v_{\text{asym}}\text{-ring, tmbibzim}$                                                                             |
| 1286 | 2.9    | 1287 | 14.7   | $v_{\text{asym}}\text{-ring, dppz phen}$                                                                            |
| 1278 | 682.5  | 1283 | 456.4  | $v_{\text{sym}}\text{-ring, tbbpy};$                                                                                |
| 1276 | 352.3  | 1277 | 449.2  | $v_{\text{sym}}\text{-ring, dppz phen}; v_{\text{sym}}\text{-ring, tbbpy};$                                         |
| 1273 | 564.8  | 1275 | 277.3  | $v_{\text{sym}}\text{-ring, tbbpy}; v_{\text{sym}}\text{-ring, dppz phen}$                                          |
|      |        | 1274 | 7890.2 | $v_{\text{sym}}\text{-ring, tmbibzim}$                                                                              |
| 1265 | 230.2  | 1266 | 156.3  | $v_{\text{asym}}\text{-ring, tbbpy}$                                                                                |
| 1260 | 8.8    |      |        | $v_{\text{asym}}\text{-ring, tmbibzim}$                                                                             |
|      |        | 1258 | 337.8  | $v_{\text{asym}}\text{-ring, tmbibzim}$                                                                             |
| 1256 | 64.6   | 1257 | 35.8   | $v_{\text{asym}}\text{-ring, tbbpy}$                                                                                |
| 1248 | 77.9   | 1250 | 62.3   | $v_{\text{sym}}\text{-ring, dppz phz}$                                                                              |
| 1245 | 62.6   |      |        | $v_{\text{asym}}\text{-ring, tmbibzim}; v_{\text{sym}}\text{-ring, tbbpy}$                                          |
|      |        | 1244 | 1011.0 | $v_{\text{sym}}\text{-ring, tmbibzim}; v_{\text{sym}}\text{-ring, tbbpy}$                                           |
|      |        | 1243 | 459.3  | $v_{\text{sym}}\text{-ring, tbbpy}; v_{\text{sym}}\text{-ring, tmbibzim};$                                          |
| 1244 | 194.0  |      |        | $v_{\text{sym}}\text{-ring, tmbibzim}$                                                                              |
| 1243 | 213.9  |      |        | $v_{\text{sym}}\text{-ring, tbbpy}, v_{\text{asym}}\text{-ring, tmbibzim}$                                          |
| 1230 | 1.2    | 1230 | 1.7    | $v_{\text{asym}}\text{-ring, dppz phz}$                                                                             |
|      |        | 1230 | 85.39  | $v_{\text{asym}}\text{-ring, tmbibzim}$                                                                             |
|      |        | 1227 | 319.6  | $v_{\text{sym}}\text{-ring, tmbibzim}$                                                                              |
| 1227 | 188.5  |      |        | $v_{\text{sym}}\text{-ring, tmbibzim}$                                                                              |
| 1213 | 7.6    |      |        | $v_{\text{asym}}\text{-ring, tmbibzim}$                                                                             |
| 1205 | 30.1   | 1206 | 22.8   | $v_{\text{sym}}\text{-ring, tbbpy}$                                                                                 |
| 1200 | 18.0   | 1205 | 1.8    | $v_{\text{asym}}\text{-ring, dppz phen}$                                                                            |
| 1203 | 24.8   | 1203 | 21.2   | $v_{\text{asym}}\text{-ring, tbbpy}$                                                                                |
| 1199 | 18.1   | 1199 | 17.5   | $v\text{-tb, tbbpy}$                                                                                                |

|      |        |      |        |                                                                                                                    |
|------|--------|------|--------|--------------------------------------------------------------------------------------------------------------------|
| 1199 | 18.3   | 1198 | 18.9   | v-tb, tbbpy                                                                                                        |
|      |        | 1184 | 87.8   | $v_{\text{asym}}\text{-ring}$ , tmbibzim                                                                           |
| 1177 | 142.1  | 1182 | 59.9   | $v_{\text{sym}}\text{-ring}$ , dppz phen                                                                           |
| 1165 | 253.8  | 1170 | 382.5  | $v_{\text{sym}}\text{-ring}$ , tmbibzim                                                                            |
| 1161 | 11.0   | 1167 | 123.3  | $v_{\text{asym}}\text{-ring}$ , tmbibzim                                                                           |
| 1150 | 1.1    | 1152 | 2.8    | $v_{\text{asym}}\text{-ring}$ , tbbpy                                                                              |
| 1145 | 27.8   | 1146 | 11.7   | $v_{\text{sym}}\text{-ring}$ , dppz phz                                                                            |
| 1128 | 64.5   | 1130 | 80.4   | $v_{\text{sym}}\text{-ring}$ , tbbpy; $v_{\text{asym}}\text{-ring}$ , dppz phz                                     |
| 1127 | 10.2   | 1129 | 22.1   | $v_{\text{asym}}\text{-ring}$ , dppz phz; $v_{\text{sym}}\text{-ring}$ , tbbpy                                     |
| 1122 | 180.3  | 1124 | 153.45 | $v_{\text{sym}}\text{-ring}$ , tbbpy                                                                               |
| 1120 | 33.4   | 1123 | 16.4   | $v_{\text{asym}}\text{-ring}$ , dppz                                                                               |
| 1115 | 2.9    | 1116 | 3.2    | $v_{\text{asym}}\text{-ring}$ , tbbpy                                                                              |
| 1109 | 276.6  | 1113 | 296.9  | $v_{\text{sym}}\text{-ring}$ , dppz                                                                                |
|      |        | 1102 | 44.3   | $v_{\text{sym}}\text{-ring}$ , tmbibzim                                                                            |
| 1101 | 10.3   | 1099 | 4.6    | $v_{\text{asym}}\text{-ring}$ , tmbibzim                                                                           |
| 1100 | 167.8  |      |        | $v_{\text{sym}}\text{-ring}$ , tmbibzim                                                                            |
| 1086 | 38.1   | 1089 | 30.6   | $v_{\text{asym}}\text{-ring}$ , dppz phen                                                                          |
| 1071 | 11.9   | 1075 | 5.6    | $v_{\text{sym}}\text{-ring}$ , dppz; $v_{\text{asym}}\text{-ring}$ , tbbpy;                                        |
| 1066 | 114.1  | 1069 | 89.89  | $v_{\text{asym}}\text{-ring}$ , tbbpy; $v_{\text{sym}}\text{-ring}$ , dppz                                         |
| 1048 | 1.7    | 1050 | 1.4    | $\delta_{\text{asym}}\text{-ch}$ , tmbibzim                                                                        |
| 1048 | 1.9    | 1050 | 1.6    | $\delta_{\text{asym}}\text{-ch}$ , tmbibzim                                                                        |
| 1042 | 1240.3 | 1044 | 1098.5 | $v_{\text{sym}}\text{-ring}$ , dppz phen                                                                           |
| 1029 | 7.9    | 1029 | 7.0    | v-tb, tbbpy                                                                                                        |
| 1029 | 6.5    | 1029 | 7.3    | v-tb, tbbpy                                                                                                        |
| 1026 | 1.6    | 1028 | 0.5    | $\delta_{\text{asym}}\text{-ch}$ , tmbibzim                                                                        |
| 1026 | 2.7    | 1028 | 0.7    | $\delta_{\text{asym}}\text{-ch}$ , tmbibzim                                                                        |
| 1026 | 36.8   | 1027 | 67.4   | v-tb, tbbpy                                                                                                        |
| 1023 | 42.8   | 1025 | 18.0   | $v_{\text{asym}}\text{-ring}$ , dppz phen; $v_{\text{sym}}\text{-ring}$ , tbbpy                                    |
| 1024 | 22.7   | 1024 | 75.5   | v-tb, tbbpy                                                                                                        |
| 1020 | 1048.2 | 1022 | 1910.3 | $v_{\text{sym}}\text{-ring}$ , tmbibzim; $v_{\text{sym}}\text{-ring}$ , tbbpy; $v_{\text{sym}}\text{-ring}$ , dppz |
| 1010 | 887.4  | 1014 | 567.0  | $v_{\text{sym}}\text{-ring}$ , tbbpy; $v_{\text{sym}}\text{-ring}$ , tmbibzim; $v_{\text{sym}}\text{-ring}$ , dppz |
| 1007 | 6.6    | 1014 | 20.1   | $v_{\text{asym}}\text{-ring}$ , tmbibzim                                                                           |
| 1006 | 19.9   | 1013 | 4.4    | $v_{\text{sym}}\text{-ring}$ , tmbibzim                                                                            |
| 1004 | 541.5  | 1008 | 314.3  | $v_{\text{asym}}\text{-ring}$ , tbbpy                                                                              |
|      |        | 1003 | 1.9    | $v_{\text{sym}}\text{-ring}$ , tmbibzim                                                                            |
| 1003 | 102.4  | 1003 | 152.0  | $v_{\text{sym}}\text{-ring}$ , dppz phz                                                                            |
|      |        | 1002 | 6.9    | $v_{\text{asym}}\text{-ring}$ , tmbibzim                                                                           |
| 999  | 14.9   |      |        | $v_{\text{sym}}\text{-ring}$ , tmbibzim                                                                            |
| 997  | 1.4    |      |        | $v_{\text{asym}}\text{-ring}$ , tmbibzim                                                                           |
| 979  | 1.0    | 987  | 0.22   | $\delta_{\text{asym}}\text{-ch}$ , dppz phen                                                                       |
| 984  | 0.1    | 986  | 0.22   | $\delta_{\text{asym}}\text{-ch}$ , dppz phz                                                                        |

|     |       |     |       |                                                                                                                               |
|-----|-------|-----|-------|-------------------------------------------------------------------------------------------------------------------------------|
| 978 | 1.2   | 986 | 0.6   | $\delta_{\text{sym}}\text{-ch}$ , dppz phen                                                                                   |
| 971 | 179.0 | 972 | 108.7 | $\nu_{\text{asym}}\text{-ring}$ , dppz                                                                                        |
| 959 | 2.5   | 961 | 0.4   | $\delta_{\text{asym}}\text{-ch}$ , tbbpy                                                                                      |
| 956 | 0.5   | 960 | 1.1   | $\delta_{\text{asym}}\text{-ch}$ , tbbpy                                                                                      |
| 953 | 1.0   | 955 | 1.0   | $\delta_{\text{sym}}\text{-ch}$ , dppz phz                                                                                    |
| 950 | 4.0   |     |       | $\nu_{\text{asym}}\text{-ring}$ , tmbibzim                                                                                    |
| 948 | 0.1   | 949 | 0.1   | $\delta_{\text{asym}}\text{-ch}$ , tbbpy                                                                                      |
| 948 | 0.1   | 949 | 0.1   | $\delta_{\text{asym}}\text{-ch}$ , tbbpy                                                                                      |
| 942 | 2.3   | 944 | 2.5   | $\delta_{\text{asym}}\text{-ch}$ , dppz phen                                                                                  |
|     |       | 943 | 3.2   | $\nu_{\text{asym}}\text{-ring}$ , tmbibzim; $\delta_{\text{asym}}\text{-ch}$ , dppz phen                                      |
|     |       | 942 | 2.9   | $\delta_{\text{asym}}\text{-ch}$ , dppz phen; $\nu_{\text{asym}}\text{-ring}$ , tmbibzim                                      |
| 938 | 3.3   |     |       | $\delta_{\text{asym}}\text{-ch}$ , dppz phen                                                                                  |
| 923 | 11.7  | 924 | 10.4  | $\delta_{\text{asym}}\text{-ch}$ , tbbpy                                                                                      |
| 923 | 17.5  | 924 | 15.4  | $\delta_{\text{asym}}\text{-ch}$ , tbbpy                                                                                      |
| 913 | 21.9  | 914 | 21.2  | $\delta_{\text{sym}}\text{-ch}$ , tbbpy                                                                                       |
| 913 | 9.9   | 914 | 9.2   | $\delta_{\text{asym}}\text{-ch}$ , tbbpy                                                                                      |
| 888 | 61.1  |     |       | $\nu_{\text{asym}}\text{-ring}$ , dppz phz; $\nu_{\text{sym}}\text{-ring}$ , tbbpy                                            |
| 887 | 4.3   | 891 | 2.2   | $\delta_{\text{sym}}\text{-ch}$ , tbbpy                                                                                       |
|     |       | 888 | 35.7  | $\nu_{\text{asym}}\text{-ring}$ , dppz phz; $\nu_{\text{sym}}\text{-ring}$ , tbbpy; $\nu_{\text{sym}}\text{-ring}$ , tmbibzim |
|     |       | 887 | 64.5  | $\nu_{\text{sym}}\text{-ring}$ , tbbpy, $\nu_{\text{sym}}\text{-ring}$ , tmbibzim; $\nu_{\text{asym}}\text{-ring}$ , dppz phz |
| 886 | 71.2  |     |       | $\nu_{\text{sym}}\text{-ring}$ , tbbpy; $\nu_{\text{asym}}\text{-ring}$ , dppz phz                                            |
|     |       | 883 | 98.8  | $\nu_{\text{sym}}\text{-ring}$ , tmbibzim; $\nu_{\text{sym}}\text{-ring}$ , tbbpy; $\nu_{\text{asym}}\text{-ring}$ , dppz phz |
| 882 | 212.6 |     |       | $\nu_{\text{sym}}\text{-ring}$ , tmbibzim                                                                                     |
| 876 | 2.3   | 883 | 3.4   | $\delta_{\text{asym}}\text{-ch}$ , tbbpy                                                                                      |
| 868 | 5.7   | 869 | 5.5   | $\delta_{\text{asym}}\text{-ch}$ , dppz phz                                                                                   |
| 859 | 2.7   | 855 | 1.2   | $\delta_{\text{asym}}\text{-ch}$ , tmbibzim                                                                                   |
| 858 | 1.4   | 854 | 0.8   | $\delta_{\text{asym}}\text{-ch}$ , tmbibzim                                                                                   |
|     |       | 843 | 2.3   | $\delta_{\text{asym}}\text{-ch}$ , tmbibzim                                                                                   |
|     |       | 842 | 3.7   | $\delta_{\text{asym}}\text{-ch}$ , tmbibzim                                                                                   |
| 838 | 12.6  | 840 | 5.8   | $\delta_{\text{asym}}\text{-ch}$ , tbbpy                                                                                      |
|     |       | 838 | 7.4   | $\delta_{\text{sym}}\text{-ch}$ , tbbpy                                                                                       |
|     |       | 838 | 64.6  | $\nu_{\text{sym}}\text{-ring}$ , dppz; $\delta_{\text{sym}}\text{-ch}$ , tbbpy; $\nu_{\text{asym}}\text{-ring}$ , tmbibzim;   |
| 837 | 60.7  |     |       | $\nu_{\text{sym}}\text{-ring}$ , dppz; $\nu_{\text{asym}}\text{-ring}$ , tmbibzim; $\delta_{\text{sym}}\text{-ch}$ , tbbpy    |
| 835 | 32.9  |     |       | $\nu_{\text{sym}}\text{-ring}$ , dppz, $\nu_{\text{asym}}\text{-ring}$ , tmbibzim; $\delta_{\text{sym}}\text{-ch}$ , tbbpy;   |
|     |       | 834 | 3.8   | $\nu_{\text{asym}}\text{-ring}$ , tmbibzim; $\delta_{\text{asym}}\text{-ch}$ , dppz; $\nu_{\text{sym}}\text{-ring}$ , tbbpy   |
|     |       | 834 | 1.3   | $\nu_{\text{asym}}\text{-ring}$ , tbbpy; $\delta_{\text{asym}}\text{-ch}$ , dppz; $\nu_{\text{asym}}\text{-ring}$ , tmbibzim  |
| 834 | 2.1   |     |       | $\nu_{\text{asym}}\text{-ring}$ , tmbibzim; $\delta_{\text{asym}}\text{-ch}$ ,                                                |

|     |      |     |      |                                                                                                                          |
|-----|------|-----|------|--------------------------------------------------------------------------------------------------------------------------|
|     |      |     |      | tbbpy; $v_{\text{sym}}\text{-ring}$ , dppz                                                                               |
| 834 | 1.6  |     |      | $v_{\text{asym}}\text{-ring}$ , tbbpy                                                                                    |
|     |      | 833 | 0.6  | $v_{\text{asym}}\text{-ring}$ , tmbibzim; $\delta_{\text{asym}}\text{-ch}$ , dppz; $v_{\text{asym}}\text{-ring}$ , tbbpy |
| 832 | 2.9  |     |      | $\delta_{\text{sym}}\text{-ch}$ , tmbibzim                                                                               |
| 831 | 1.8  |     |      | $\delta_{\text{asym}}\text{-ch}$ , tmbibzim                                                                              |
| 830 | 0.8  |     |      | $\delta_{\text{asym}}\text{-ch}$ , dppz                                                                                  |
| 807 | 6.3  | 809 | 8.0  | $\delta_{\text{sym}}\text{-ch}$ , dppz phen                                                                              |
| 791 | 3.0  | 793 | 2.72 | $\delta_{\text{asym}}\text{-ch}$ , dppz                                                                                  |
| 785 | 3.4  | 788 | 0.24 | $\delta_{\text{asym}}\text{-ch}$ , dppz phen                                                                             |
| 786 | 39.4 | 786 | 30.2 | $v_{\text{sym}}\text{-ring}$ , tbbpy                                                                                     |
|     |      | 783 | 46.6 | $v_{\text{sym}}\text{-ring}$ , tmbibzim                                                                                  |
| 780 | 2.4  |     |      | $v_{\text{sym}}\text{-ring}$ , tmbibzim                                                                                  |
|     |      | 778 | 18.2 | $v_{\text{asym}}\text{-ring}$ , tmbibzim                                                                                 |

a) The nominated symmetry is referred to the ligand mirror plane containing the Ru atom.
